# Supplementary material for: Molecular mechanism of green tea polyphenol epicatechin gallate attenuating Staphylococcus aureus pathogenicity by targeting Ser/Thr phosphatase Stp1
Source: Royal Society of Chemistry journal article supplement (doi:10.1039/d3fo00170a), 2023-01-01
Supplement: d3fo00170a1.pdf [file d3fo00170a1.pdf]

1  
2  
3  
4  
5  
6  
7  
8  
9  
10  
11  
12  
13  
14  
15  
16  
17

# Supporting Information

## **Molecular mechanism of green tea polyphenol Epicatechin gallate attenuating *Staphylococcus aureus* pathogenicity by targeting Ser/Thr phosphatase Stp1**

Yawen Gao<sup>a</sup>, Hongsu Wang<sup>a</sup>, Xuening Li<sup>a</sup>, Xiaodi Niu<sup>a,\*</sup>

<sup>a</sup> College of Food Science and Engineering, Jilin University, Changchun 130062, P.R. China.

\* Corresponding author:

Xiaodi Niu, College of Food Science and Engineering, Jilin University, Changchun 130062, P.R. China

Tel.: +86 13604318028; fax: +0431-87836376.

E-mail address: niuxd@jlu.edu.cn (Xiaodi Niu).

## 18 Figures and tables

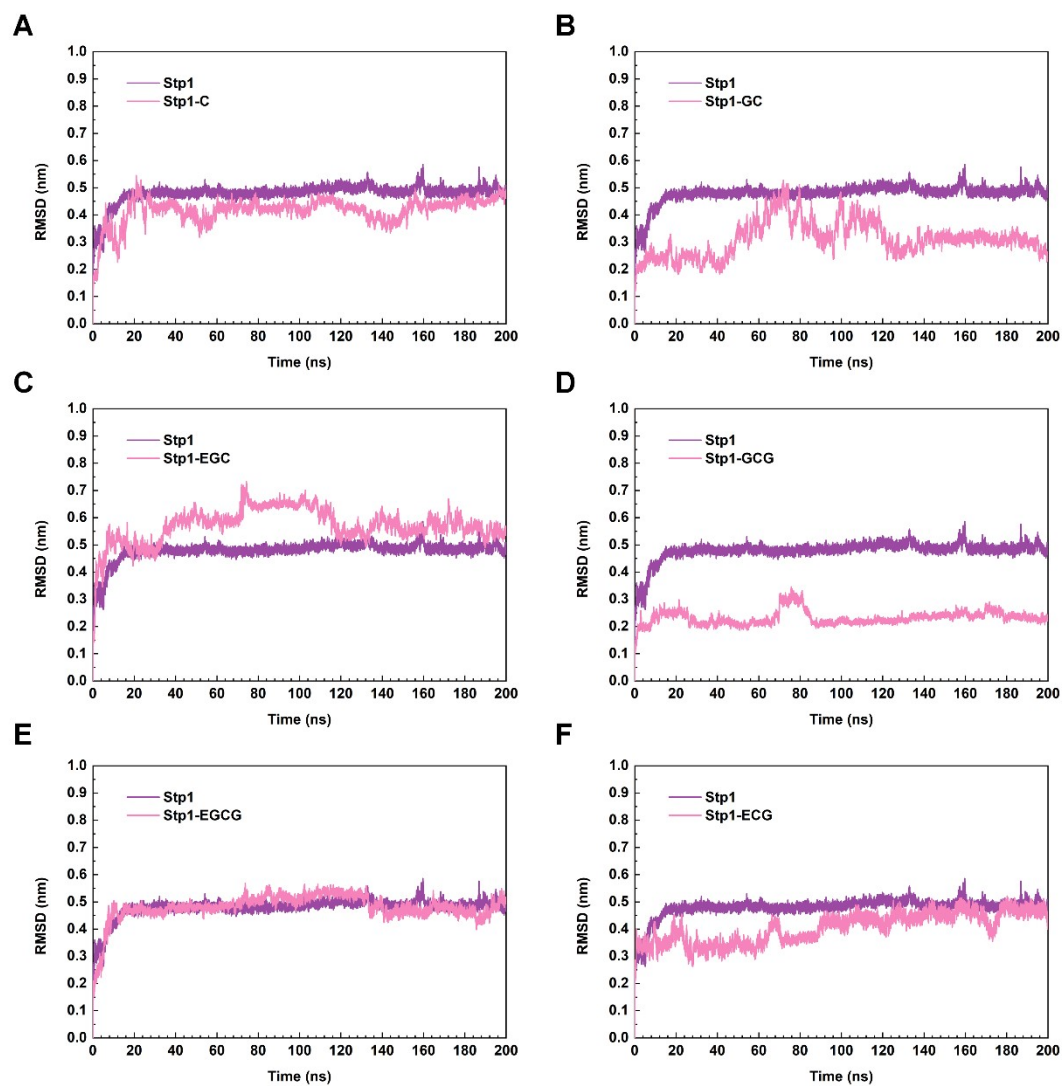

19

20 **Fig. S1** The RMSD displayed by the backbone atoms of Stp1 during MD simulations

21 of free protein and Stp1-ligand complexes.

22

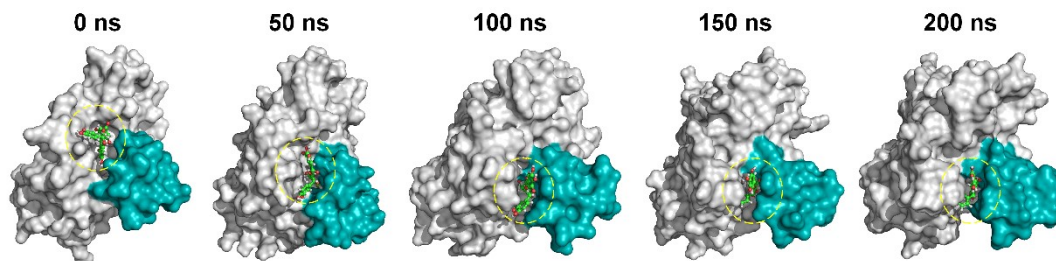

23

24 **Fig. S2** The migration of ECG during MD simulations.

25

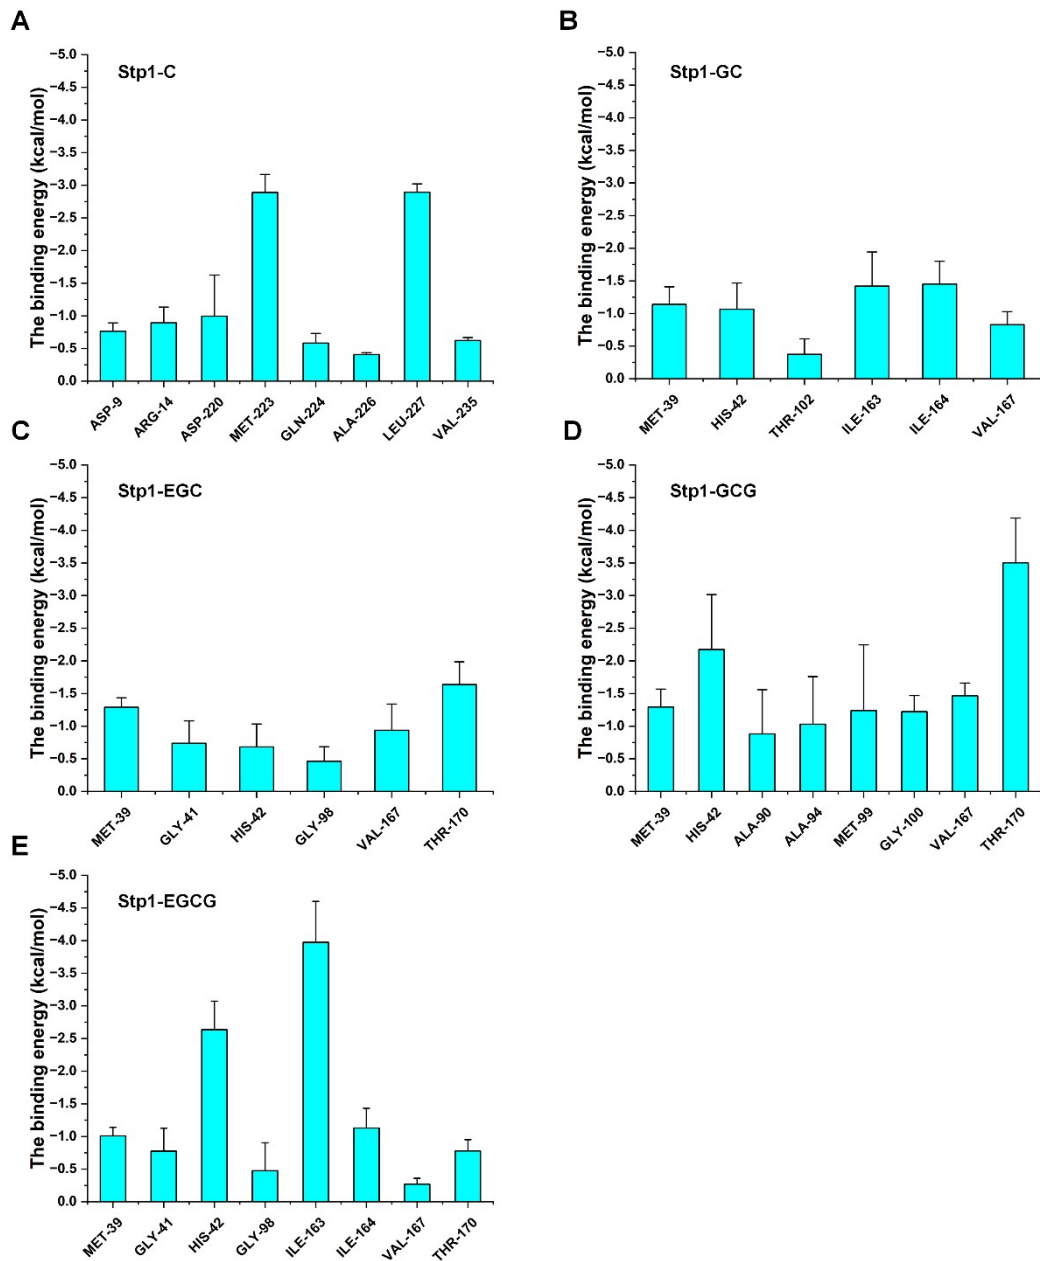

26

27 **Fig. S3** Decomposition of the binding energy on residues in the binding sites of Stp1-

28 ligand complex models.

29

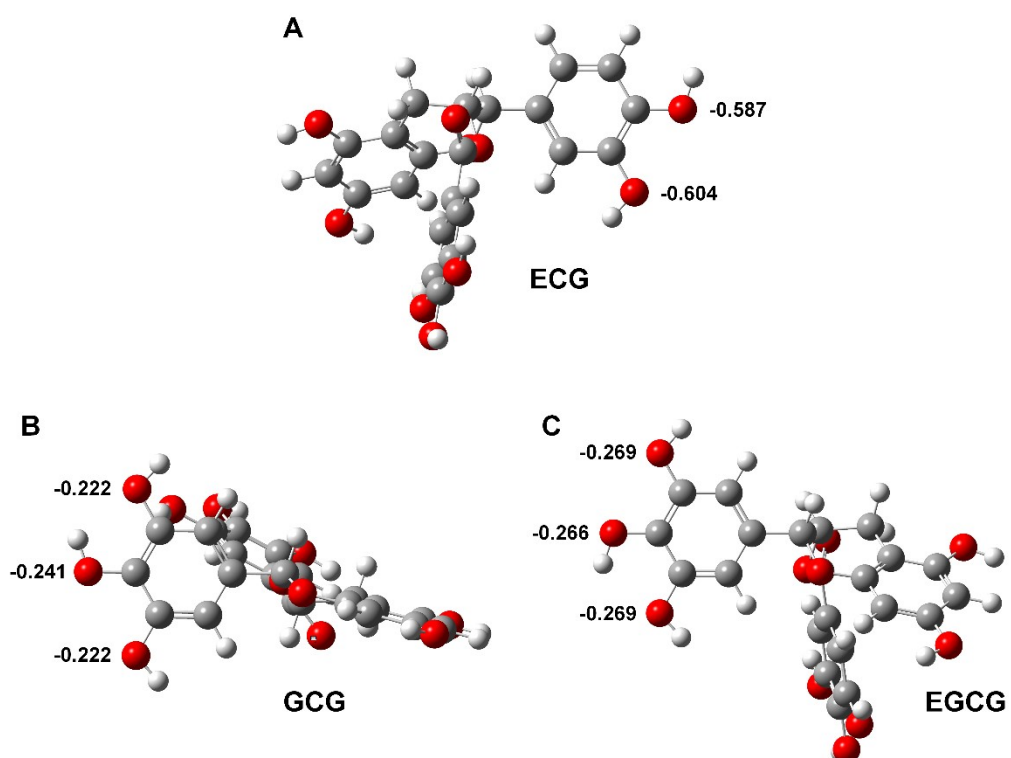

30

31 **Fig. S4** The charge distribution of oxygen atoms on GCG, EGCG, and ECG.

32

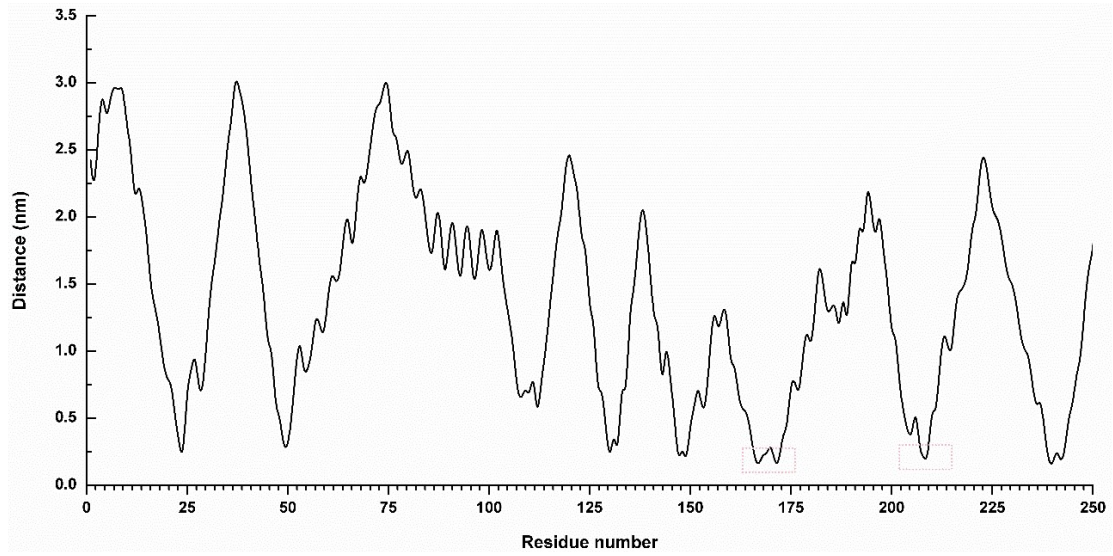

33

34 **Fig. S5** The distance between the whole residues of Stp1 and ECG.

35

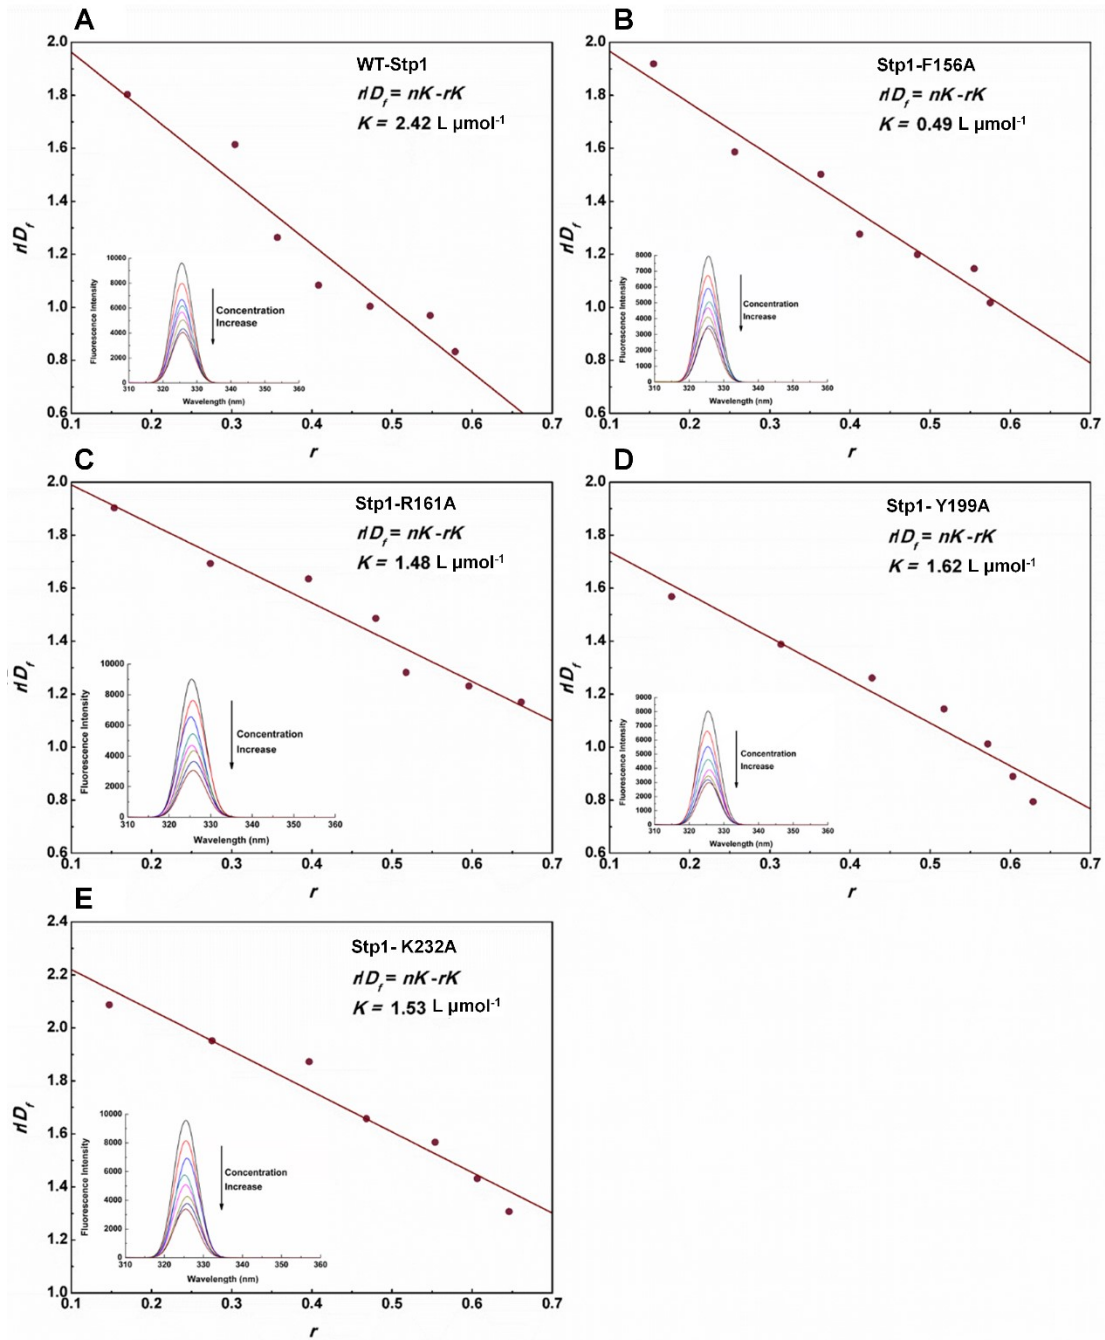

36

37 **Fig. S6** The Scatchard plots of  $r/D_f$  vs.  $r$  for ECG binding to WT-Stp1 (A), Stp1-F156A

38 (B), Stp1-R161A (C), Stp1-Y199A (D), and Stp1-K232A (E). inset: Effects of ECG on

39 fluorescence spectra of Stp1 with the concentration increase.

40

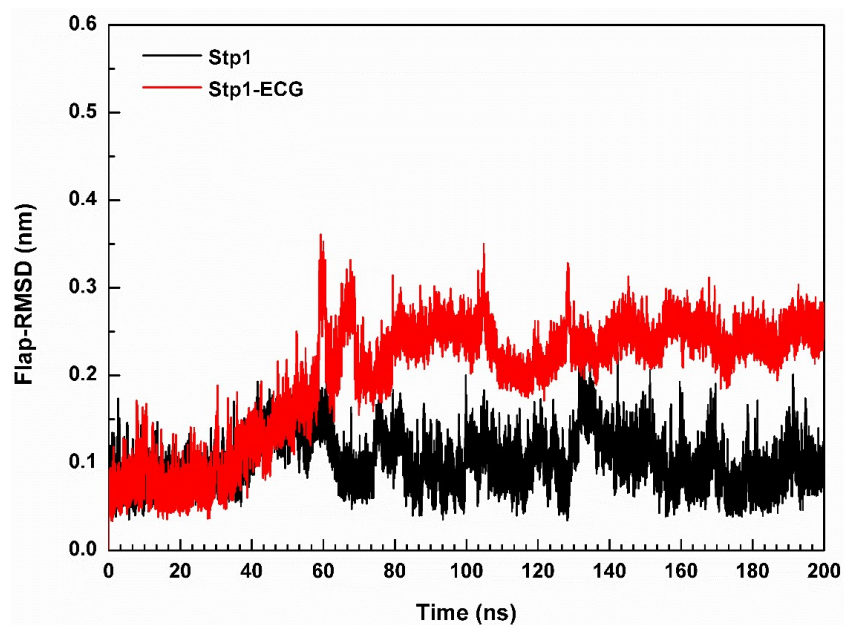

41

42 **Fig. S7** RMSD values of the backbone atoms of flap subdomains in free Stp1 and Stp1-

43 ECG complex.

44



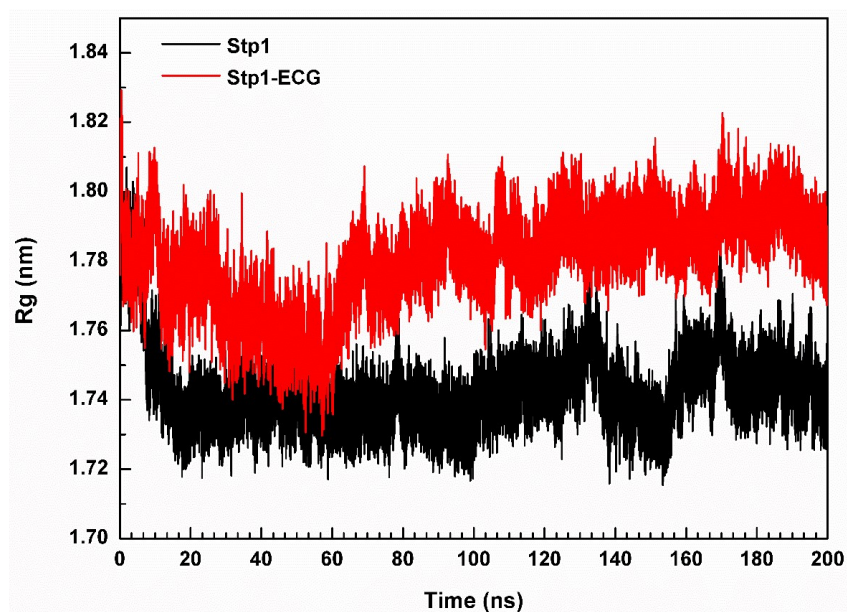

45

46 **Fig. S8** Radius of gyration (Rg) values of backbone atoms in free Stp1 and Stp1-ECG  
47 complex.

48

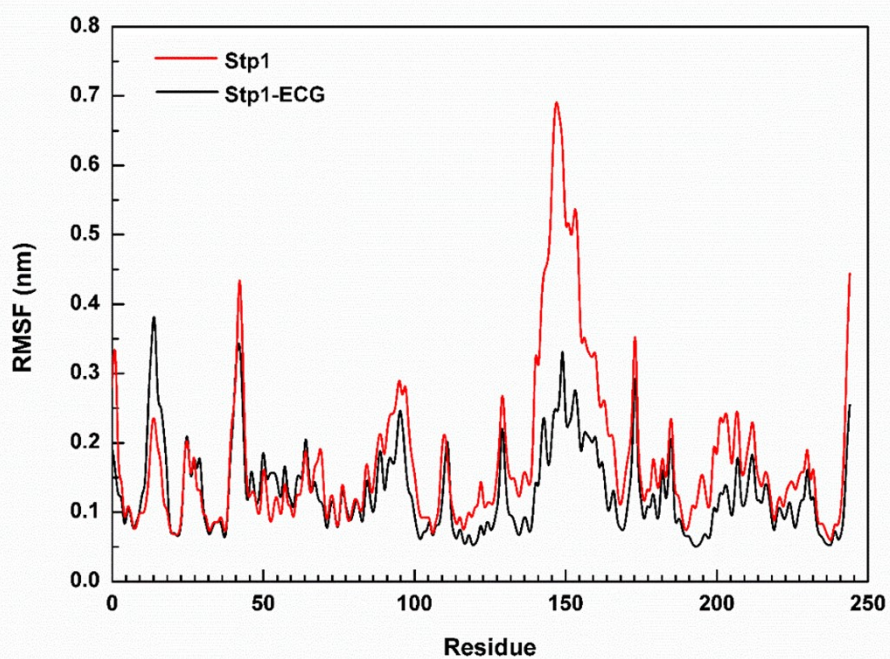

49

50 **Fig. S9** RMSF of all the residues in free Stp1 and Stp1-ECG complex.

51

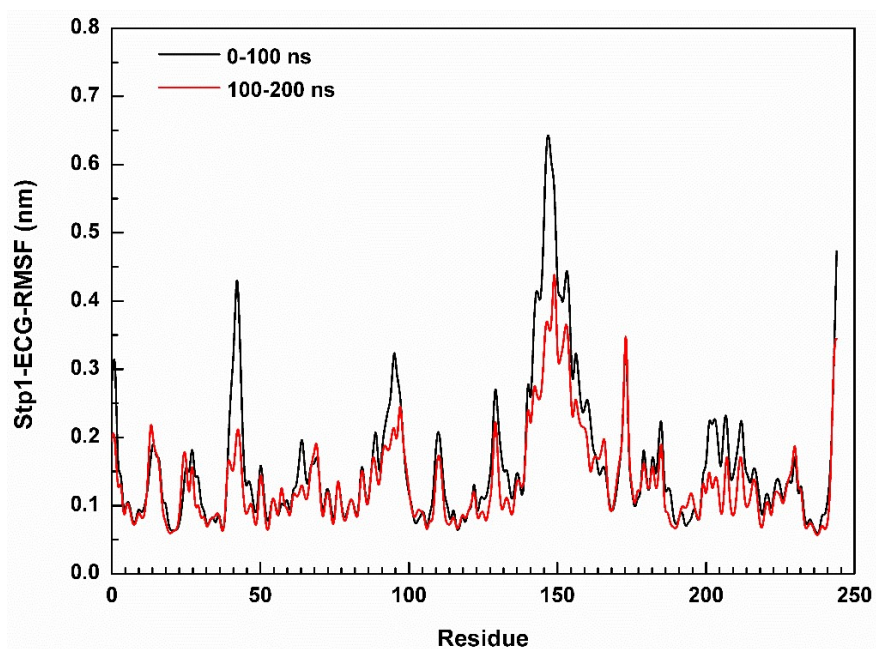

52

53 **Fig. S10** RMSF values of the whole residues in Stp1-ECG complex during 0-100 ns  
54 and 100-200 ns.

55

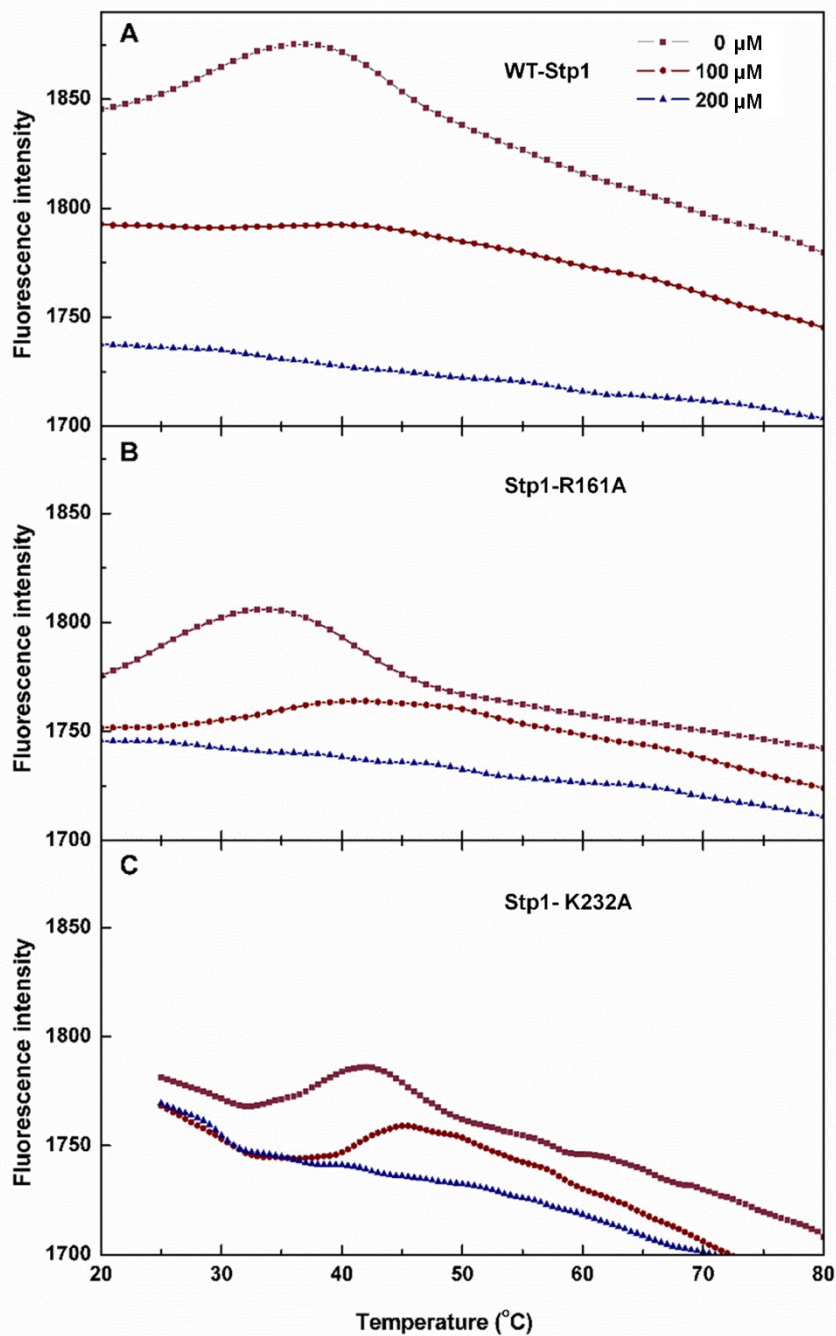

56

57 **Fig. S11** The  $T_m$  of Stp1 and mutants via thermal shift assay. The effects of various  
 58 amounts of ECG on the fluorescence curves of the WT-Stp1 (A), R161A (B), and  
 59 K232A (C) variants.

60

61 **Table S1** Primers used for mutagenesis in this study.

| <b>Primers</b> | <b>Sequence (5'-3')</b>          |
|----------------|----------------------------------|
| Stp1F156A-F    | CCGGAAGAAGCAGCGACACATCCACAAC     |
| Stp1F156A-R    | GTTGTGGATGTGTCGCTGCTTCTTCCGG     |
| Stp1R161A-F    | CACATCCACAAGCGAATATTATTAC        |
| Stp1R161A-R    | GTAATAATATTCGCTTGTGGATGTG        |
| Stp1Y199A-F    | GATGGATTAAGTATGCGGTAAAGACAATGA   |
| Stp1Y199A-R    | TCATTGTCTTTAACCGCATCAGTTAATCCATC |
| Stp1K232A-F    | GATAACCATTTCGGCGGATAACGTTAC      |
| Stp1K232A-R    | GTAACGTTATCCGCCGAATGGTTATC       |

62

63 **Table S2** Primers used for qRT-PCR in this study.

| <b>Primers</b>                   | <b>Sequence (5'-3')</b>      |
|----------------------------------|------------------------------|
| <i>16S -F</i>                    | ACCAGTGGCGAAGGCGACTTT        |
| <i>16S-R</i>                     | CAGGCGGAGTGCTTAATGCGTTA      |
| <i>hla-F</i>                     | GCGGCCTTATTGGTGCAAAT         |
| <i>hla-R</i>                     | TGCCATATACCGGGTTCCAAG        |
| <i>hld-F</i>                     | GGAGTGATTTCAATGGCACAAGAT     |
| <i>hld-R</i>                     | GTGAATTTGTTCACTGTGTCGATAATCC |
| <i>PSM <math>\beta</math>2-F</i> | ATGACTGGACTAGCAGAAGCAATCG    |
| <i>PSM <math>\beta</math>2-R</i> | ACCTAGTAAACCCACACCGTTAGCA    |

64

65 **Table S3** The binding free energy (kcal mol<sup>-1</sup>) of ECG with WT-Stp1 and mutants

66 based on MM-PBSA method.

| <b>Energy</b>             | <b>WT</b>     | <b>F156A</b>   | <b>K232A</b>   | <b>R161A</b>  | <b>Y199A</b>   |
|---------------------------|---------------|----------------|----------------|---------------|----------------|
| <b>Component</b>          |               |                |                |               |                |
| $\Delta E_{vdw}$          | -36.12 ± 3.43 | -42.83 ± 4.19  | -42.57 ± 3.97  | -40.13 ± 4.29 | -39.96 ± 3.68  |
| $\Delta E_{ele}$          | -58.62 ± 8.84 | -74.45 ± 7.53  | -61.98 ± 8.28  | -59.18 ± 8.59 | -61.37 ± 8.44  |
| $\Delta G_{ele,sol}$      | 67.69 ± 8.51  | 94.22 ± 6.79   | 78.41 ± 6.78   | 76.79 ± 7.19  | 78.48 ± 6.65   |
| $\Delta G_{nonpolar,sol}$ | -5.65 ± 0.14  | -6.04 ± 0.16   | -5.56 ± 0.17   | -5.83 ± 0.20  | -5.99 ± 0.18   |
| $\Delta G_{gas}$          | -94.74 ± 8.97 | -117.28 ± 7.53 | -104.54 ± 7.65 | -99.31 ± 8.77 | -101.32 ± 7.03 |
| $\Delta G_{sol}$          | 62.04 ± 8.46  | 88.19 ± 6.70   | 72.85 ± 6.79   | 70.97 ± 7.13  | 72.49 ± 6.65   |
| $\Delta G_{bind}$         | -32.70 ± 4.06 | -29.09 ± 2.88  | -31.70 ± 3.15  | -28.34 ± 5.44 | -28.84 ± 3.75  |

67
